# Supplementary material for: Non-linear transformations of age at diagnosis, tumor size, and number of positive lymph nodes in prediction of clinical outcome in breast cancer
Source: Springer Nature journal article supplement (doi:10.1186/s12885-018-5123-x), 2018-12-01
Supplement: MOESM1 [file 16324588]

**Supplement Table 1.** Patient and tumor characteristics for the different patient materials in the derivation set.

| <b>Factor</b>                          | <b>I<sup>a</sup></b> | <b>II<sup>a</sup></b> | <b>III<sup>a</sup></b> | <b>IV<sup>a</sup></b> | <b>V<sup>a</sup></b> | <b>VI<sup>a</sup></b> |
|----------------------------------------|----------------------|-----------------------|------------------------|-----------------------|----------------------|-----------------------|
| <i>No of patients</i>                  | 362                  | 624                   | 561                    | 1,553                 | 841                  | 536                   |
| <i>Distant recurrences<sup>b</sup></i> | 125                  | 237                   | 233                    | 382                   | 251                  | 87                    |
| <i>Age median, years</i>               | 47                   | 63                    | 45                     | 65                    | 59                   | 58                    |
| <i>Age range, years</i>                | 27–63                | 34–71                 | 25–58                  | 43–86                 | 24–93                | 25–88                 |
| Age <35                                | 12                   | 1                     | 33                     | 0                     | 16                   | 7                     |
| Age 35–50                              | 233                  | 4                     | 438                    | 26                    | 220                  | 102                   |
| Age >50                                | 117                  | 619                   | 90                     | 1,527                 | 605                  | 427                   |
| <i>Tumor size</i>                      |                      |                       |                        |                       |                      |                       |
| T1 (≤20 mm)                            | 148                  | 257                   | 207                    | 548                   | 425                  | 357                   |
| T2 (21–50 mm)                          | 212                  | 367                   | 351                    | 998                   | 361                  | 171                   |
| T3 (>50 mm)                            | 2                    | 0                     | 3                      | 7                     | 55                   | 8                     |
| <i>Lymph nodes</i>                     |                      |                       |                        |                       |                      |                       |
| Negative                               | 125                  | 258                   | 160                    | 518                   | 403                  | 319                   |
| 1–3 positive                           | 165                  | 251                   | 274                    | 671                   | 279                  | 141                   |
| 4–9 positive                           | 50                   | 82                    | 97                     | 277                   | 102                  | 41                    |
| ≥10 positive                           | 22                   | 33                    | 30                     | 87                    | 57                   | 35                    |
| <i>Adjuvant medical treatment</i>      |                      |                       |                        |                       |                      |                       |
| Endocrine therapy                      | 0                    | 419                   | 270                    | 1,553                 | 139                  | 281                   |
| Chemotherapy                           | 236                  | 0                     | 4                      | 0                     | 163                  | 57                    |
| Chemo-endocrine                        | 0                    | 0                     | 4                      | 0                     | 32                   | 38                    |
| None                                   | 126                  | 205                   | 283                    | 0                     | 507                  | 158                   |
| Missing                                | 0                    | 0                     | 0                      | 0                     | 0                    | 2                     |

<sup>a</sup>Patient material I [20], II [21, 22], III [23], IV [24], V [25], and VI [26].

<sup>b</sup>Number of distant recurrences is for 10 years follow-up time.
