# Supplementary material for: Non-linear transformations of age at diagnosis, tumor size, and number of positive lymph nodes in prediction of clinical outcome in breast cancer
Source: Springer Nature journal article supplement (doi:10.1186/s12885-018-5123-x), 2018-12-01
Supplement: MOESM2 [file 16324588]

1  
2  
3

**Supplement Table 2.** Categorized predictors in three or four groups.

| Factor                    | HR (95% CI)      |
|---------------------------|------------------|
| <i>Age at diagnosis</i>   |                  |
| <35 years vs. >50 years   | 1.39 (0.95–2.02) |
| 35–50 years vs. >50 years | 0.89 (0.75–1.06) |
| <i>Tumor size</i>         |                  |
| T2 vs. T1                 | 1.60 (1.42–1.80) |
| T3 vs. T1                 | 3.53 (2.56–4.88) |
| <i>Lymph nodes</i>        |                  |
| N1–3 vs. N0               | 1.66 (1.44–1.91) |
| N4–9 vs. N0               | 3.50 (2.98–4.10) |
| N≥10 vs. N0               | 7.23 (6.02–8.68) |

4  
5  
6
